# Supplementary material for: Preparation of Fibrillated Cellulose Nanofiber from Lyocell Fiber and Its Application in Air Filtration
Source: MDPI journal article supplement (doi:10.3390/ma11081313), 2018-07-29
Supplement: s1 [file s1]

**Table S1.** Technical data sheet of Lyocell fiber

| <b>Properties</b>        | <b>Value</b>           |
|--------------------------|------------------------|
| Standard Filament Size   | 1.7 dtex               |
| Standard Cut Lengths     | 4 mm                   |
| Cross-section            | Round                  |
| Luster                   | Bright, uncrimped      |
| Specific Gravity         | 1.53 g/cm <sup>3</sup> |
| Whiteness                | 63 CIE                 |
| Finish level             | 0.22%                  |
| Dry Tenacity             | 4.5 - 5.0 g/den        |
| Elongation at break, dry | 24% – 26%              |
| Wet Tenacity             | 3.9 - 4.3 g/den        |
| Elongation at break, wet | 16% - 18%              |
| Degree of polymerization | 550 - 600              |
| Initial Moisture Content | 10%                    |
| Dispersibility in water  | Very good              |
